# Supplementary material for: Treatment of renal interstitial fibrosis with an agonistic Tie2 monoclonal antibody via amelioration of peritubular capillary lesions in a mouse model of nephropathy
Source: Research Square preprint supplement (doi:10.21203/rs.3.rs-1784752/v1), 2022-07-05
Supplement: Supplementary file 1 [file 2359fd467096dafcb9b66881.docx]

Fig. S1 Evidence for successful induction of the FAN mouse model


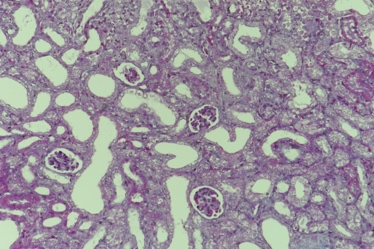

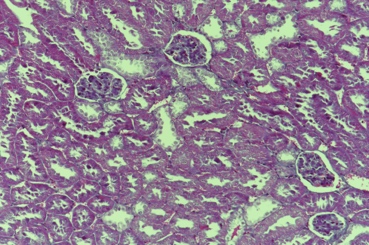


WT

a

b

FAN

(a) Masson staining was performed to evaluate the tubulointerstitial lesions in murine renal tissues (magnification, ×200) on day 7. (b) Urine protein/creatinine ratio in mice on day 2. All data are expressed as mean ± SD (n = 6). **P* < 0.05, ***P* < 0.01.
